1 **Increased levels of anxiety among medical and non-medical university students during the**  
2 **COVID-19 pandemic in the United Arab Emirates.**

3  
4 **Basema Saddik<sup>1,2</sup>, Amal Hussein<sup>1</sup>, Fatemeh Saheb Sharif-Askari<sup>2</sup>, Waad Kheder<sup>3</sup>,**  
5 **Mohamad-Hani Temsah<sup>4</sup>, Rim Adnan Koutaich<sup>5</sup>, Enad Sami Haddad<sup>5</sup>, Nora Marwan Al-**  
6 **Roub<sup>5</sup>, Fatema Adel Marhoon<sup>5</sup>, Qutayba Hamid<sup>2,5</sup>, Rabih Halwani<sup>\*2,5</sup>**

7 <sup>1</sup>Department of Family and Community Medicine, College of Medicine, University of Sharjah,  
8 Sharjah, United Arab Emirates

9  
10 <sup>2</sup>Sharjah Institute of Medical Research, College of Medicine, University of Sharjah, Sharjah,  
11 United Arab Emirates

12  
13 <sup>3</sup>College of Dental Medicine, University of Sharjah, Sharjah, United Arab Emirates

14  
15 <sup>4</sup> Department of Pediatrics, College of Medicine, King Saud University, Riyadh, Saudi Arabia.

16  
17 <sup>5</sup>Department of Clinical Sciences, College of Medicine, University of Sharjah, Sharjah, United  
18 Arab Emirates

19 **\*Correspondence:**

20 Corresponding Author  
21 rhalwani@sharjah.ac.ae

22  
23 **Keywords: COVID-19, anxiety, medical students, GAD-7, United Arab Emirates**

24  
25 **Abstract**

26  
27 **Introduction:** The COVID-19 pandemic is likely to increase anxiety levels within the community  
28 and in particular medical students who are already considered psychologically vulnerable groups.  
29 Since the COVID-19 outbreak, no study has yet estimated the effect of this pandemic on university  
30 students in the UAE or its impact on the psychological well-being of medical students.

31  
32 **Methods:** In this study, we surveyed 1485 medical (comprising medical and dental) and non-  
33 medical university students across 4 emirates within the UAE. We used an online platform to  
34 assess knowledge, sources of information, changes in hygienic behavior, perceptions of fear and  
35 worry and anxiety levels using the generalized anxiety disorder 7 (GAD-7) scale. The GAD-7  
36 score was measured at three time points; during hospital visits for medical/dental students, before  
37 the introduction of online learning and after online learning for all students.

38  
39 **Results:** The majority of students demonstrated high levels of knowledge and utilized reliable  
40 sources of information. Non-medical students exercised higher compliance with social restrictions,  
41 while medical students practiced better hand hygiene. Almost half of students reported anxiety  
42 levels ranging from mild to severe with females reporting higher anxiety scores during hospital  
43 visits (OR=2.02, 95% CI, 1.41 to 2.91) and medical students reporting lower anxiety levels in  
44 comparison to dental students (OR=0.61, 95% CI, 0.45 to 0.84). Medical students reported higher

45 levels of anxiety during their clinical rotations which decreased with the introduction of online  
46 learning, yet, non-medical student's anxiety levels increased with online learning.

47  
48 **Conclusions:** This is the first study to provide important information on the initial response and  
49 anxiety levels in university students across the UAE. The findings from our study can be used to  
50 support the development of effective screening strategies and interventions to build psychological  
51 resilience among university students during the COVID-19 pandemic or any other public health  
52 emergencies in the future.

53

## 54 **Introduction**

55 Human coronaviruses (HCoVs) have long been considered inconsequential pathogens, causing the  
56 common cold in otherwise healthy people. However, in the 21st century, two highly pathogenic  
57 HCoVs—severe acute respiratory syndrome coronavirus (SARS-CoV) and Middle East  
58 respiratory syndrome coronavirus (MERS-CoV)—emerged from animal reservoirs to cause global  
59 epidemics with alarming morbidity and mortality in 2003 and 2012 respectively. In December  
60 2019, yet another pathogenic HCoV, SARS-CoV-2, was recognized in Wuhan, China, causing  
61 Coronavirus disease (COVID-19) [1] and raising intense attention not only within China but  
62 internationally [1].

63 Since its first detection, COVID-19 has become a major health problem and the global outbreak  
64 was declared a pandemic by the World Health Organization (WHO) on March 11<sup>th</sup>, 2020 [2]. To  
65 date, more than 3.4 million laboratory-confirmed cases have been reported worldwide with  
66 ~245,000 deaths in 184 countries, bringing the crude case fatality rate (CFR) of COVID-19 to  
67 ~7.2% [3]. The first confirmed case of COVID-19 in the United Arab Emirates (UAE) was reported  
68 on 29 January 2020. The UAE had 13,599 confirmed cases (10,816 active; 2,664 recovered; 119  
69 deaths; CFR ~1.1%, as of 3<sup>rd</sup> May 2020) [4].

70 The emergence of such a novel and highly contagious pandemic and its uncertainty is likely to  
71 raise community anxiety and have a psychological impact on communities overall. Social  
72 distancing, quarantine and disruption of studies, are especially pertinent on impacting university  
73 students, and in particular medical students who are already considered psychologically vulnerable  
74 groups. The highly competitive training of these students, their academic pressure, exposure to  
75 patients in clinical settings, financial constraints and lack of sleep are factors which may already  
76 contribute to psychological problems associated with stress and anxiety [5-7]. Additionally, during  
77 disease outbreaks, medical students, like healthcare workers, are perceived to be at higher risk of  
78 infection because of their clinical training, and hence increased risk of exposure to the virus [8, 9].  
79 This is in addition to their fear of transmitting the virus back to their family and loved ones [10].

80 In previous infectious disease outbreaks, such as MERS-CoV and SARS, almost one quarter of  
81 medical students reported mild to moderate anxiety in Saudi Arabia [11] and anxiety levels were  
82 found to be higher in medical students than non-medical students in Hong Kong [12].

83 Since the COVID-19 outbreak, no study has yet estimated the effect of this pandemic on university  
84 students in the UAE and its impact on the psychological well-being of medical students. In this

85 study, we aim to assess medical student’s psychological distress and concerns during the recent  
86 COVID-19 pandemic, their degree of perceived information about the disease, and their overall  
87 attitude, practices and behaviors during the outbreak. We also evaluate students’ perceptions on  
88 the precautionary measures in place and the effectiveness of educational strategies in reducing  
89 anxiety levels in the United Arab Emirates. This makes our study the first in the UAE to discuss  
90 this aspect in the current pandemic.

## 91 **Methods and Materials**

### 92 *Design and participants*

93 A cross-sectional study design was used to conduct this research during the COVID-19 outbreak  
94 in March 2020. Data were collected between March 11 and March 21. University students from  
95 medical, dental and non-medical colleges across the UAE were invited to participate in the  
96 research through an online web survey hosted on the platform survey monkey  
97 (<https://www.surveymonkey.com/r/VSYTNQ9>)[13] (S1). All students enrolled in the medical and  
98 dental colleges at the University of Sharjah received the survey link through their university emails  
99 using convenience sampling. Students from other universities received the survey link through  
100 WhatsApp and other social media platforms using snowball sampling where acquaintances sent  
101 the link to each other. Through the survey link, the first page explained the research objectives and  
102 assured participants anonymity and confidentiality. Students’ acceptance indicated their consent  
103 to participate in the study. The study was approved by the University of Sharjah Research Ethics  
104 Committee (REC-20-03-03-02) prior to participant recruitments.

### 105 *Sample size*

106 A study conducted in Saudi Arabia during the MERS-COV outbreak found that 77% of medical  
107 students reported minimal anxiety levels [11]. Using this proportion and a confidence level of 95%  
108 and margin of error of 5%, we calculated the minimum required sample size to be 278 for each of  
109 the medical and non-medical groups. To account for non-response the sample size was increased  
110 by 20%, making the minimum sample size required for this study 333 students for each of the  
111 medical and non-medical groups.

### 112 *Data collection*

113 A questionnaire comprising of 18 items was used in this study. A modified version of a  
114 questionnaire measuring medical student anxiety previously used in Saudi Arabia during the  
115 MERS-CoV outbreak was used, after the author's permission[10, 11]. The questions were divided  
116 into seven domains comprising of 1) demographic questions, 2) change in hygienic behavior, with  
117 responses measured on a 4 point Likert scale ranging from very much has changed to no change  
118 at all, 3) level of knowledge on statements related to COVID-19 such as transmission, treatment,  
119 prognosis and prevention measured by true/false/don’t know responses, 4) perceptions of worry  
120 and fear associated with COVID-19 measured on a 5-point Likert scale, ranging from very worried  
121 to not worried at all, and their opinion about the public fear associated with COVID-19 being  
122 justifiable or dysfunctional, measured on a 5-point Likert scale, ranging from strongly agree to  
123 strongly disagree, 5) perception of receiving enough information on COVID-19 on a 5-point Likert  
124 scale, ranging from strongly agree to strongly disagree, 6) the sources of information students  
125 resorted to for information on COVID-19 and 7) Measurement of anxiety levels.

126 In order to measure anxiety levels, we used the generalized anxiety disorder scale (GAD-7) [14]  
127 which is a 7-item questionnaire asking participants how often they were bothered by each symptom  
128 such as feeling nervous, trouble relaxing, irritable and afraid that something awful might happen  
129 during the last 2 weeks. Response options were “not at all,” “several days,” “more than half the  
130 days,” and “nearly every day,” scored as 0, 1, 2, and 3, respectively. A score of 10 or greater  
131 represents a reasonable cut point for identifying cases of anxiety with a sensitivity of 89% and  
132 specificity 82%, internal consistency (Cronbach  $\alpha=.92$ ) and Test-retest reliability (intraclass  
133 correlation=0.83)[14]. The GAD-7 has also been identified as a screener for panic disorder, social  
134 phobia and PTSD ( with a cutoff score of 8 sensitivity 77% and specificity 82%) [15]. In our study,  
135 the GAD-7 score was totaled for each student and classified into cut-off points of (0-4 minimal, 5-  
136 9 mild, 10-14 moderate and 15-21 severe) levels of anxiety. Levels of anxiety were measured using  
137 the GAD-7 scale at three different time points. In addition to calculating the mean GAD-7 score,  
138 scores were classified into 3 categories (minimal, mild and moderate/severe anxiety).

139 During the launch of data collection for this study, the UAE Ministry of Education declared  
140 university campuses to move to online learning to prevent the spread of COVID-19 and classes  
141 moved online on March 8. In order to determine levels of anxiety of students during the transition  
142 to online learning, medical and dental students were asked to respond to the GAD-7 questions  
143 reflecting back to the time they were attending hospital visits within the previous two weeks. This  
144 was to assess whether higher levels of anxiety were associated with hospital visits. All students  
145 were asked to respond to the GAD-7 questions reflecting on “before the introduction of online  
146 learning”, and “after the introduction of online learning”.

147 The final version of the questionnaire was piloted to ensure clarity and consistency between survey  
148 items. To ensure face and content validity of the survey instrument, the survey was sent to a group  
149 of 9 experts which consisted of students, tutors, faculty and a psychiatrist who reviewed the survey  
150 for content accuracy, clarity and comprehensiveness and whether the survey met its objectives. As  
151 a result, the phrasing and response items of some questions were modified, and format was edited  
152 for clarity and comprehensibility

### 153 *Statistical analysis*

154 Descriptive statistics, including means, medians, frequencies and percentages were used to  
155 summarize data and to illustrate the demographic and other selected characteristics of students.  
156 Normality of data was tested visually using the Q-Q plots and statistically using the Kolmogorov-  
157 Smirnov test. Bivariate analysis using Chi-square ( $\chi^2$ ) and Mann-Whitney U tests explored the  
158 associations between student demographic characteristics and anxiety levels. Spearman's  
159 correlation coefficient,  $r$ , was used to evaluate the association between knowledge score and GAD-  
160 7 score. Statistically significant factors in the bivariate analysis were included in the multivariate  
161 ordinal logistic regression analyses to determine if they predicted student anxiety levels. The  
162 estimates of the strengths of associations were demonstrated by the odds ratio (OR) with a 95%  
163 confidence interval (CI). A two-tailed  $p < 0.05$  was considered statistically significant. Data were  
164 analyzed using IBM SPSS Version 25.0 [16]

## 165 **Results**

166 In total, 1484 students responded to the questionnaire and data were analyzed for 1385 completed  
167 surveys (completion rate 93.3%) from 4 different emirates across the UAE. The mean age of  
168 students was 20 years and most participants were females (72%). Almost three quarter of the

169 students were studying medicine or dental medicine and from those students a third (35%) were in  
170 their clinical years of study and were completing clinical ward rotations. Of these students, (12%)  
171 reported being in contact with an infected or suspected case of COVID-19. Demographic  
172 characteristics are shown in Table 1.

### 173 *Hygienic Practices*

174 The majority of students reported increased hand hygiene (85%), increased use of hand sanitizer  
175 (85.5%), avoiding people with flu like symptoms (80%) and decreased visits to crowded places  
176 (77%). A lower proportion of students reported wearing gloves and masks (58%), decreased social  
177 visits (62%) or decreased hand shaking (58%). We combined medical and dental students together  
178 as the medical group, and all other specialties made up the non-medical group. When medical and  
179 non-medical students were compared, more non-medical students avoided being in contact with  
180 people with flu-like symptoms, had decreased social visits, decreased visits to crowded places and  
181 use of public facilities as displayed in Figure 1.

### 182 *Knowledge and perception of information on COVID-19*

183 Most students agreed they had heard enough information on the symptoms, prognosis,  
184 transmission and prevention of COVID-19. When we compared medical and non-medical  
185 students, significantly more medical students reported having heard sufficient information on  
186 COVID-19 prognosis,  $\chi^2(2, N=1385) = 55.20, p<0.001$  and COVID-19 transmission,  $\chi^2(2,$   
187  $N=1385) = 17.88, p<0.001$ . (Table 2). Overall, students had good knowledge of COVID-19 with  
188 over 70% of students answering correctly on the COVID-19 knowledge questions with a median  
189 score of 5 (from a maximum score of 7). When we compared participant's knowledge scores by  
190 field of study, gender and contact with COVID-19, we found that medical students, females and  
191 students who had been in contact with COVID-19 cases had significantly higher knowledge scores  
192 than their counterparts, as shown in Table 2.

### 193 *Student sources of information on COVID-19*

194 Students' main sources of information were official websites, press releases from the Ministry of  
195 Health (MOH) and social media. A statistically significant higher percentage of medical students  
196 reported using the WHO website (52%) ( $p\leq 0.001$ ), MOH (50%) ( $p=0.001$ ), hospital  
197 announcements (27%) ( $p\leq 0.001$ ) and social media (54%) ( $p=0.010$ ) to retrieve their information  
198 as displayed in Figure 2.

### 199 *Levels of anxiety and worry among students*

200 The median GAD-7 scores for medical students during their hospital visits, for all students before  
201 introduction of online learning and after online learning were 4, 4 and 3, respectively. When we  
202 compared GAD-7 scores for medical students by gender, specialty (dental or medical), contact  
203 with COVID-19, rotation type and clinical phase of study, we found that females, dental medicine  
204 students, students who had been in contact with COVID-19 patients and students in their clinical  
205 phase of study reported statistically significant higher anxiety levels. More students (27%) in low-  
206 risk ward rotations reported mild anxiety while the majority of students who reported moderate to  
207 severe levels of anxiety (26%) were attending high risk ward rotations  $\chi^2(3, N=1385) = 10.92,$   
208  $p=0.027$  (Table 3).

209 Overall, females reported higher levels of anxiety in GAD-7, both before and after online learning.  
210 The medical students reported higher levels of anxiety before online learning in comparison to  
211 non-medical students (Table 3).

212 Interestingly, anxiety levels significantly decreased for females and for medical students after  
213 switching to the online learning, with  $\chi^2(2, N=1385) = 12.22, p < 0.001$  and  $\chi^2(2, N=1385) = 20.99,$   
214  $p < 0.001$ , respectively, with a higher percentage of decreased anxiety among dental students; whilst  
215 non-medical students reported higher levels of anxiety after the introduction of online learning ( $\chi^2$   
216  $(4, N=1385) = 36.38, p < 0.001$ ) (Table 3).

217 The majority of students (73%) reported being worried about transmitting COVID-19 to one of  
218 their family members or friends, while 65% of them were worried about catching the virus  
219 themselves. Almost half (49%) of medical students reported being worried about transmitting  
220 COVID-19 to others and were less likely (29%) to worry about catching it themselves, in  
221 comparison to non-medical students (35%), although the differences were not statistically  
222 significant ( $\chi^2(2, N=1385) = 2.85, p = 0.24$ ). Most students (61%) agreed that the public fear was  
223 justifiable and (46%) of students did not perceive it as dysfunctional.

224 A cumulative odds ordinal logistic regression with proportional odds was performed to determine  
225 predictors of anxiety levels during the different time points. The effect of gender, specialty, contact  
226 with COVID-19, rotation type, clinical phase of study and knowledge score on the GAD-7 score  
227 during hospital visits was modelled. We included knowledge score in the regression model because  
228 we found a positive, but weak, correlation between knowledge score and anxiety score using  
229 Spearman's correlation ( $r_s = 0.086, p = 0.015$ ). The odds of females having higher anxiety scores  
230 during hospital visits was 2.02 (95% CI, 1.41 to 2.91) times that for males, and medical students  
231 reported lower anxiety levels in comparison to dental medicine students (OR=0.61, 95% CI, 0.45  
232 to 0.84). Furthermore, being in a rotation and demonstrating higher knowledge scores predicted  
233 higher GAD-7 scores during hospital visits (Table 4). Similarly, gender, field of study and  
234 knowledge score predicted higher GAD-7 scores before online learning, but only gender and field  
235 of study predicted GAD-7 scores after switching to online learning (Table 4).

236

## 237 Discussion

238 This study has revealed that the COVID-19 pandemic has impacted on anxiety levels among  
239 university students in the UAE, with almost half of students reporting mild to moderate/severe  
240 anxiety levels. The effect of COVID-19 on the global community overall has been considerably  
241 significant, causing fear, anxiety and worry, particularly due to uncertainty of the prognosis of the  
242 disease, changes in societies lifestyles, lockdown restrictions and educational disruptions. The  
243 impact of COVID-19 on university students is particularly burdensome due to the perceived effect  
244 of the virus on their studies; and with medical students specifically it could be due to the  
245 interdisciplinary nature of their training and the potential proximity of being exposed to the virus  
246 during their clinical studies [17]

247 Overall, students in our study demonstrated good knowledge of COVID-19 and reported using  
248 reliable sources such as official statements and press releases from the ministry of health and the  
249 WHO website. Although the use of these sources was higher among medical students, social media  
250 was the main source of information for both medical and non-medical students. This finding is

251 consistent with the literature and emphasizes the role that social media can play in risk perception  
252 and dissemination of reliable information during a pandemic such as COVID-19 [18-21].  
253 However, other studies have also reported that young people tend to obtain a large amount of  
254 information from social media which can easily be a trigger for stress and anxiety [22].

255 Good knowledge may also explain students' compliance with hygienic practices in our study. Most  
256 students reported significant change in their hygienic behavior since the COVID-19 outbreak,  
257 particularly for increased hand hygiene, avoiding crowded places and avoiding being in contact  
258 with people with flu like symptoms. However, even though levels of knowledge were significantly  
259 higher among medical students, compliance with hygienic practices were similar for both groups.  
260 Furthermore, we found significant positive correlations between changes in hygienic behavior and  
261 increased levels of anxiety. More than half of students who reported changed hygienic practices  
262 reported higher levels of anxiety, which is consistent with recent literature indicating that people  
263 who were more anxious about COVID-19 were also more engaged with regular hand hygiene and  
264 social distancing behaviors [23].

265 There is increasing evidence that the number of growing cases of COVID-19 globally and within  
266 the UAE is causing public worry and concern[24, 25] and in the absence of vaccines and effective  
267 treatment, government authorities have introduced rules and restrictions[26]. Compliance and  
268 adherence with these restrictions has been found to differ amongst different age groups and  
269 populations, with less acceptance of these restrictions being reported amongst younger age-groups  
270 [27]. However, in our study, the majority of students did not consider the strict measures  
271 undertaken by the healthcare authorities as dysfunctional or not required. The students were  
272 worried about transmitting COVID-19 to their family members more than they were worried about  
273 catching the virus themselves, therefore, indicating a beneficial sense of social responsibility  
274 during such infectious disease outbreak. Similar concerns were reported amongst healthcare  
275 workers in Hong Kong and Canada during the SARS outbreak [28, 29].

276 The results from the current study confirm that anxiety levels due to COVID-19 among university  
277 students are high, ranging from mild to severe, especially amongst females, which is in accordance  
278 with previous research [22, 30, 31]. The majority of students in our study were females, which  
279 reflects the gender imbalance in higher education within the UAE. More than two thirds of students  
280 reported mild anxiety levels and one third of students reported severe anxiety. What makes this  
281 study unique, is that medical and non-medical students were compared, and within the medical  
282 student group, we compared medical and dental students. Furthermore, this study assessed anxiety  
283 levels at three different time points: during hospital visits for medical and dental students, before  
284 online learning and after switching to the online learning for all students. Among the  
285 medical/dental group, students in their clinical phase of study and who had rotations in high risk  
286 wards or who had been in contact with COVID-19 patients reported significantly higher (moderate  
287 to severe) levels of anxiety, demonstrating that high risk perception of COVID-19 may contribute  
288 to higher levels of anxiety. Medical/dental students continued attending the hospitals at the early  
289 onset of COVID-19 when fear and worry associated with the outbreak would have been at their  
290 peak and before lockdown restrictions were in place, which could also explain their high  
291 compliance with infection control measures. Medical students high risk perceptions associated  
292 with attending hospitals during infectious disease outbreaks has been reportedly associated with  
293 higher levels of anxiety [12, 21]. However, when we compared between medical and dental  
294 students, dental students reported higher levels of anxiety and these remained significant with  
295 further multivariate analysis. Previous studies have established that medical and dental programs

296 are highly competitive and students generally experience high levels of stress during their training  
297 [32, 33]. Yet, dental students suffer from greater levels of perceived stress than medical students  
298 due to their role as providers of care and earlier exposure to patients in the dental clinics [34].  
299 Furthermore, dental students are in very close proximity to patients and are dealing directly with  
300 patients' dental care during a potentially highly transmissible respiratory virus. This may explain  
301 the higher levels of anxiety among dental students in our study and the overall decrease in anxiety  
302 among all medical students following the introduction of online learning. Psychological support  
303 should be tailored to each students' needs and incorporated into the online remote curriculum.  
304 Screening university students on a regular basis with tools such as the GAD-7 could help faculty  
305 in the early identification of highly anxious students and guide students to receive help from  
306 targeted interventions that promote psychological well-being, offer counselling, mental health  
307 support and coping mechanisms[35].

308 Non-medical students reported higher levels of anxiety before and after online learning in  
309 comparison to medical students and whilst medical student anxiety levels decreased following the  
310 introduction of online learning, non-medical student's anxiety levels increased. This may be due  
311 to several factors, including medical students possibly being more familiar with the use of online  
312 learning platforms, being distant from the perceived risk of COVID-19, or due to the variable  
313 sources of information about the pandemic among both groups. Knowledge of the virus might  
314 reduce students fears and anxiety while inadequate understanding of COVID-19, its prognosis,  
315 transmission and control measures might contribute to negative implications and fear of the  
316 unknown [29] hence explaining the higher anxiety levels in non-medical students in our study.

### 317 *Limitations*

318 Despite the findings of this study, we acknowledge that it has several limitations. Firstly, the use  
319 of convenience sampling and its descriptive nature through an online survey may not allow the  
320 generalization of results. However, considering the need for a rapid method to assess stress and  
321 anxiety in a vulnerable population during a rapidly evolving infectious disease outbreak, the use  
322 of an online survey serves as a promising method for quick results [36]. Additionally, responses  
323 were collected from four different emirates across the UAE with good response rate allowing for  
324 a certain element of representation. Secondly, the nature of self-reported data in the survey may  
325 lead to response biases specifically for hygienic practices where students may provide socially  
326 desirable responses and self-reported levels of anxiety, stress and worry which may not always be  
327 as accurate as being assessed by a mental health professional. However, despite these limitations,  
328 this study provides important baseline information which will inform further research and public  
329 health interventions in this area.

### 330 *Conclusion*

331 To the best of our knowledge, this is the first study to provide important information on the initial  
332 response and anxiety levels in university students across the UAE immediately following the  
333 period COVID-19 was declared a global pandemic. More than half of university students reported  
334 mild to severe anxiety levels with a quarter of students reporting severe anxiety. Specifically,  
335 medical students reported higher levels of anxiety during their clinical rotations which decreased  
336 with the introduction of online learning, yet, non-medical student's anxiety levels increased with  
337 online learning. The findings from our study can be used at the government and university level to  
338 develop effective screening strategies and to formulate interventions that improve mental health  
339 of students. Such strategies will reduce unnecessary stress and anxiety among university students,



340 as well as build psychological resilience during the COVID-19 pandemic or any other public health  
341 emergencies in the future.

### 342 **Conflict of Interest**

343 The authors declare that the research was conducted in the absence of any commercial or financial  
344 relationships that could be construed as a potential conflict of interest.

### 345 **Author Contributions**

346 RH, BS, FS, WK and MT conceived, designed and initiated the study. RK, EH, NA, FM  
347 contributed to the planning and implementation of the study. AH analyzed survey data. BS, AH,  
348 RH interpreted the results. BS drafted the manuscript with input from RH, AH, FS, MT and QH.  
349 All authors read and approved the final version of the manuscript.

### 350 **Acknowledgements**

351 The authors would like to thank all students who participated in the study.

### 352 **Supplementary Material**

353 The survey used to collect data for this study is provided as supplementary material.

354

### 355 **References**

- 356 1. Paules CI, Marston HD, Fauci AS. Coronavirus Infections-More Than Just the Common  
357 Cold. *Jama*. 2020. Epub 2020/01/24. doi: 10.1001/jama.2020.0757. PubMed PMID: 31971553.
- 358 2. WHO. World Health Organisation Director General's opening remarks at the media  
359 briefing on COVID-19, 11th March 2020. [https://www.who.int/dg/speeches/detail/who-director-](https://www.who.int/dg/speeches/detail/who-director-general-s-opening-remarks-at-the-media-briefing-on-covid-19--11-march-2020)  
360 [general-s-opening-remarks-at-the-media-briefing-on-covid-19--11-march-2020](https://www.who.int/dg/speeches/detail/who-director-general-s-opening-remarks-at-the-media-briefing-on-covid-19--11-march-2020). 30-3-2020.
- 361 3. WHO. World Health Organization. Coronavirus disease (COVID-19) outbreak.  
362 <https://covid19.who.int/>. 3-5-2020.
- 363 4. DOH. Department of Health (UAE). . <https://www.doh.gov.ae/covid-19>. 3-5-2020.
- 364 5. Al Saadi T, Zaher Addeen S, Turk T, Abbas F, Alkhatib M. Psychological distress among  
365 medical students in conflicts: a cross-sectional study from Syria. *BMC medical education*.  
366 2017;17(1):173. Epub 2017/09/22. doi: 10.1186/s12909-017-1012-2. PubMed PMID: 28931387;  
367 PubMed Central PMCID: PMC5607487.
- 368 6. Quek TT, Tam WW, Tran BX, Zhang M, Zhang Z, Ho CS, et al. The Global Prevalence  
369 of Anxiety Among Medical Students: A Meta-Analysis. *International journal of environmental*  
370 *research and public health*. 2019;16(15). Epub 2019/08/03. doi: 10.3390/ijerph16152735. PubMed  
371 PMID: 31370266; PubMed Central PMCID: PMC6696211.
- 372 7. Trivate T, Dennis AA, Sholl S, Wilkinson T. Learning and coping through reflection:  
373 exploring patient death experiences of medical students. *BMC medical education*. 2019;19(1):451.  
374 Epub 2019/12/06. doi: 10.1186/s12909-019-1871-9. PubMed PMID: 31801494; PubMed Central  
375 PMCID: PMC6894273.
- 376 8. Kim S, Kim S. Exploring the Determinants of Perceived Risk of Middle East Respiratory  
377 Syndrome (MERS) in Korea. *International journal of environmental research and public health*.  
378 2018;15(6). Epub 2018/06/06. doi: 10.3390/ijerph15061168. PubMed PMID: 29867054; PubMed  
379 Central PMCID: PMC6025578.

- 380 9. Al Ghobain M, Aldrees T, Alenezi A, Alqaryan S, Aldabeeb D, Alotaibi N, et al. Perception  
381 and Attitude of Emergency Room Resident Physicians toward Middle East Respiratory Syndrome  
382 Outbreak. *Emergency medicine international*. 2017;2017:6978256. Epub 2017/05/11. doi:  
383 10.1155/2017/6978256. PubMed PMID: 28487774; PubMed Central PMCID:  
384 PMCPMC5402244.
- 385 10. Goulia P, Mantas C, Dimitroula D, Mantis D, Hyphantis T. General hospital staff worries,  
386 perceived sufficiency of information and associated psychological distress during the A/H1N1  
387 influenza pandemic. *BMC infectious diseases*. 2010;10:322. Epub 2010/11/11. doi: 10.1186/1471-  
388 2334-10-322. PubMed PMID: 21062471; PubMed Central PMCID: PMCPMC2990753.
- 389 11. Al-Rabiaah A, Temsah MH, Al-Eyadhy AA, Hasan GM, Al-Zamil F, Al-Subaie S, et al.  
390 Middle East Respiratory Syndrome-Corona Virus (MERS-CoV) associated stress among medical  
391 students at a university teaching hospital in Saudi Arabia. *Journal of infection and public health*.  
392 2020. Epub 2020/02/01. doi: 10.1016/j.jiph.2020.01.005. PubMed PMID: 32001194; PubMed  
393 Central PMCID: PMCPMC7102651.
- 394 12. Wong TW, Gao Y, Tam WWS. Anxiety among university students during the SARS  
395 epidemic in Hong Kong. *Stress and health*. 2007;23(1):31-5. doi: 10.1002/smi.1116.
- 396 13. SurveyMonkey. San Mateo. CA.
- 397 14. Spitzer RL, Kroenke K, Williams JB, Lowe B. A brief measure for assessing generalized  
398 anxiety disorder: the GAD-7. *Archives of internal medicine*. 2006;166(10):1092-7. Epub  
399 2006/05/24. doi: 10.1001/archinte.166.10.1092. PubMed PMID: 16717171.
- 400 15. Kroenke K, Spitzer RL, Williams JB, Monahan PO, Lowe B. Anxiety disorders in primary  
401 care: prevalence, impairment, comorbidity, and detection. *Annals of internal medicine*.  
402 2007;146(5):317-25. Epub 2007/03/07. doi: 10.7326/0003-4819-146-5-200703060-00004.  
403 PubMed PMID: 17339617.
- 404 16. IBM Corp. Released 2017. IBM SPSS Statistics for Windows VA, NY: IBM Corp.
- 405 17. Rastegar Kazerooni A, Amini M, Tabari P, Moosavi M. Peer mentoring for medical  
406 students during COVID-19 pandemic via a social media platform. *Medical education*. 2020. Epub  
407 2020/05/01. doi: 10.1111/medu.14206. PubMed PMID: 32353893.
- 408 18. Albarrak AI, Mohammed R, Al Elayan A, Al Fawaz F, Al Masry M, Al Shammari M, et  
409 al. Middle East Respiratory Syndrome (MERS): Comparing the knowledge, attitude and practices  
410 of different health care workers. *Journal of infection and public health*. 2019. Epub 2019/08/23.  
411 doi: 10.1016/j.jiph.2019.06.029. PubMed PMID: 31431424; PubMed Central PMCID:  
412 PMCPMC7102554.
- 413 19. Karasneh R, Al-Azzam S, Muflih S, Soudah O, Hawamdeh S, Khader Y. Media's effect on  
414 shaping knowledge, awareness risk perceptions and communication practices of pandemic  
415 COVID-19 among pharmacists. *Research in social & administrative pharmacy : RSAP*. 2020.  
416 Epub 2020/04/29. doi: 10.1016/j.sapharm.2020.04.027. PubMed PMID: 32340892; PubMed  
417 Central PMCID: PMCPMC7179508.
- 418 20. Khan MU, Shah S, Ahmad A, Fatokun O. Knowledge and attitude of healthcare workers  
419 about Middle East Respiratory Syndrome in multispecialty hospitals of Qassim, Saudi Arabia.  
420 *BMC public health*. 2014;14:1281. Epub 2014/12/17. doi: 10.1186/1471-2458-14-1281. PubMed  
421 PMID: 25510239; PubMed Central PMCID: PMCPMC4300996.
- 422 21. Yang S, Cho SI. Middle East respiratory syndrome risk perception among students at a  
423 university in South Korea, 2015. *American journal of infection control*. 2017;45(6):e53-e60. Epub  
424 2017/04/08. doi: 10.1016/j.ajic.2017.02.013. PubMed PMID: 28385465; PubMed Central  
425 PMCID: PMCPMC7115287.

- 426 22. Qiu J, Shen B, Zhao M, Wang Z, Xie B, Xu Y. A nationwide survey of psychological  
427 distress among Chinese people in the COVID-19 epidemic: implications and policy  
428 recommendations. *General psychiatry*. 2020;33(2):e100213. Epub 2020/03/28. doi:  
429 10.1136/gpsych-2020-100213. PubMed PMID: 32215365; PubMed Central PMCID:  
430 PMC7061893.
- 431 23. Harper CA, Satchell LP, Fido D, Latzman RD. Functional Fear Predicts Public Health  
432 Compliance in the COVID-19 Pandemic. *International journal of mental health and addiction*.  
433 2020:1-14. Epub 2020/04/30. doi: 10.1007/s11469-020-00281-5. PubMed PMID: 32346359;  
434 PubMed Central PMCID: PMC7185265.
- 435 24. Bao Y, Sun Y, Meng S, Shi J, Lu L. 2019-nCoV epidemic: address mental health care to  
436 empower society. *Lancet (London, England)*. 2020;395(10224):e37-e8. Epub 2020/02/12. doi:  
437 10.1016/s0140-6736(20)30309-3. PubMed PMID: 32043982; PubMed Central PMCID:  
438 PMC7133594.
- 439 25. Rajkumar RP. COVID-19 and mental health: A review of the existing literature. *Asian*  
440 *journal of psychiatry*. 2020;52:102066. Epub 2020/04/18. doi: 10.1016/j.ajp.2020.102066.  
441 PubMed PMID: 32302935; PubMed Central PMCID: PMC7151415.
- 442 26. Ryan BJ, Coppola D, Canyon DV, Brickhouse M, Swienton R. COVID-19 Community  
443 Stabilization and Sustainability Framework: An Integration of the Maslow Hierarchy of Needs and  
444 Social Determinants of Health. *Disaster medicine and public health preparedness*. 2020:1-16. Epub  
445 2020/04/22. doi: 10.1017/dmp.2020.109. PubMed PMID: 32314954.
- 446 27. Zettler I, Christoph Schild, Lau Lilleholt, and Robert Böhm. Individual Differences in  
447 Accepting Personal Restrictions to Fight the COVID-19 Pandemic: Results from a Danish Adult  
448 Sample. *PsyArXiv*. 2020;Preprint. Epub 23 Mar 2020. doi: doi:10.31234/osf.io/pkm2a.
- 449 28. Maunder RG, Lancee WJ, Balderson KE, Bennett JP, Borgundvaag B, Evans S, et al. Long-  
450 term psychological and occupational effects of providing hospital healthcare during SARS  
451 outbreak. *Emerging infectious diseases*. 2006;12(12):1924-32. Epub 2007/03/01. doi:  
452 10.3201/eid1212.060584. PubMed PMID: 17326946; PubMed Central PMCID:  
453 PMC3291360.
- 454 29. Wong JG, Cheung EP, Cheung V, Cheung C, Chan MT, Chua SE, et al. Psychological  
455 responses to the SARS outbreak in healthcare students in Hong Kong. *Medical teacher*.  
456 2004;26(7):657-9. Epub 2005/03/15. doi: 10.1080/01421590400006572. PubMed PMID:  
457 15763860.
- 458 30. Liu N, Zhang F, Wei C, Jia Y, Shang Z, Sun L, et al. Prevalence and predictors of PTSS  
459 during COVID-19 outbreak in China hardest-hit areas: Gender differences matter. *Psychiatry*  
460 *research*. 2020;287:112921. Epub 2020/04/03. doi: 10.1016/j.psychres.2020.112921. PubMed  
461 PMID: 32240896; PubMed Central PMCID: PMC7102622 of interest.
- 462 31. Wang C, Pan R, Wan X, Tan Y, Xu L, Ho CS, et al. Immediate Psychological Responses  
463 and Associated Factors during the Initial Stage of the 2019 Coronavirus Disease (COVID-19)  
464 Epidemic among the General Population in China. *International journal of environmental research*  
465 *and public health*. 2020;17(5). Epub 2020/03/12. doi: 10.3390/ijerph17051729. PubMed PMID:  
466 32155789; PubMed Central PMCID: PMC7084952.
- 467 32. Aboalshamat K, Hou XY, Strodl E. Psychological well-being status among medical and  
468 dental students in Makkah, Saudi Arabia: a cross-sectional study. *Medical teacher*. 2015;37 Suppl  
469 1:S75-81. Epub 2015/02/05. doi: 10.3109/0142159x.2015.1006612. PubMed PMID: 25649101.
- 470 33. Ahmad FA, Karimi AA, Alboloushi NA, Al-Omari QD, AlSairafi FJ, Qudeimat MA.  
471 Stress Level of Dental and Medical Students: Comparison of Effects of a Subject-Based

- 472 Curriculum versus a Case-Based Integrated Curriculum. *Journal of dental education*.  
473 2017;81(5):534-44. Epub 2017/05/04. doi: 10.21815/jde.016.026. PubMed PMID: 28461630.
- 474 34. Murphy RJ, Gray SA, Sterling G, Reeves K, DuCette J. A comparative study of  
475 professional student stress. *Journal of dental education*. 2009;73(3):328-37. Epub 2009/03/18.  
476 PubMed PMID: 19289722.
- 477 35. Roberto A, Almeida A. [Mental health of students of medicine: exploraty study in the  
478 Universidade da Beira Interior]. *Acta medica portuguesa*. 2011;24 Suppl 2:279-86. Epub  
479 2012/08/08. PubMed PMID: 22849913.
- 480 36. Geldsetzer P. Use of Rapid Online Surveys to Assess People's Perceptions During  
481 Infectious Disease Outbreaks: A Cross-sectional Survey on COVID-19. *Journal of medical  
482 Internet research*. 2020;22(4):e18790. Epub 2020/04/03. doi: 10.2196/18790. PubMed PMID:  
483 32240094; PubMed Central PMCID: PMC7124956.

484

485

486

487

488

489

490

491

492

493

494

495

496

497

498

499

500

501

502

503

504

505

506

507

**Table 1: Demographic characteristics of students (N=1385)**

|                                                         |            | Frequency (n) | Percentage (%) |
|---------------------------------------------------------|------------|---------------|----------------|
| <b>Age (years) [mean ± SD]</b>                          | 20.5 ± 2.3 |               |                |
| <b>Gender</b>                                           |            |               |                |
| Female                                                  |            | 994           | 71.8           |
| Male                                                    |            | 391           | 28.2           |
| <b>Emirate</b>                                          |            |               |                |
| Sharjah                                                 |            | 814           | 58.8           |
| Dubai                                                   |            | 107           | 7.7            |
| Ajman                                                   |            | 446           | 32.2           |
| Al-Ain/RAK                                              |            | 18            | 1.3            |
| <b>Field of study</b>                                   |            |               |                |
| Medical                                                 |            | 719           | 51.9           |
| Dental                                                  |            | 323           | 23.3           |
| Non-medical                                             |            | 343           | 24.8           |
| <b>Phase of study for medical/dental students</b>       |            |               |                |
| Pre-Clinical                                            |            | 685           | 65.5           |
| Clinical                                                |            | 361           | 34.5           |
| <b>Current ward rotation for clinical students*</b>     |            |               |                |
| Not in a rotation                                       |            | 33            | 9.8            |
| High risk rotation                                      |            | 25            | 7.4            |
| Low risk rotation                                       |            | 280           | 82.8           |
| <b>Contact with suspected COVID-19 patient</b>          |            |               |                |
| Yes                                                     |            | 152           | 12.1           |
| No                                                      |            | 1109          | 87.9           |
| <b>GAD-7 Score Median [IQR]</b>                         |            |               |                |
| <i>During hospital visits (medical/dental students)</i> | 4 [8]      |               |                |
| Minimal                                                 |            | 368           | 53.1           |
| Mild                                                    |            | 166           | 24.0           |
| Moderate                                                |            | 82            | 11.8           |
| Severe                                                  |            | 77            | 11.1           |
| <i>Before online learning (all students)</i>            | 4 [9]      |               |                |
| Minimal                                                 |            | 570           | 52.3           |
| Mild                                                    |            | 274           | 25.1           |
| Moderate                                                |            | 116           | 10.6           |
| Severe                                                  |            | 130           | 11.9           |
| <i>After online learning (all students)</i>             | 3 [8]      |               |                |
| Minimal                                                 |            | 620           | 56.9           |
| Mild                                                    |            | 254           | 23.3           |
| Moderate                                                |            | 105           | 9.6            |
| Severe                                                  |            | 111           | 10.2           |
| <b>Knowledge Score Median [IQR]</b>                     |            |               |                |
|                                                         | 5 [1]      |               |                |

508 \*High risk rotation includes ICU, ER, OR, Isolation wards

509

510

511

512

513

514 **Table 2: Perception of sufficient COVID-19 information by field of study and knowledge of**  
 515 **COVID-19 by demographic factors**

| <b>I believe I have heard sufficient information about COVID-19, n (%)</b>         |             |                            |            |                       |                |                |
|------------------------------------------------------------------------------------|-------------|----------------------------|------------|-----------------------|----------------|----------------|
|                                                                                    |             | Strongly disagree/Disagree | Neutral    | Agree/ Strongly agree | Chi-Square *   | <i>P-value</i> |
| <b>Symptoms</b>                                                                    | Medical     | 94 (11.2)                  | 87 (10.3)  | 660 (78.5)            | 2.99           | 0.224          |
|                                                                                    | Non-medical | 16 (7.8)                   | 27 (13.2)  | 162 (79.0)            |                |                |
| <b>Prognosis</b>                                                                   | Medical     | 159 (18.9)                 | 145 (17.2) | 537 (63.9)            | 55.20          | <0.0001        |
|                                                                                    | Non-medical | 33 (16.1)                  | 84 (41.0)  | 88 (42.9)             |                |                |
| <b>Treatment</b>                                                                   | Medical     | 305 (36.3)                 | 212 (25.2) | 324 (38.5)            | 4.74           | 0.094          |
|                                                                                    | Non-medical | 88 (42.9)                  | 54 (26.3)  | 63 (30.7)             |                |                |
| <b>Transmission</b>                                                                | Medical     | 56 (6.7)                   | 60 (7.1)   | 725 (86.2)            | 17.88          | <0.0001        |
|                                                                                    | Non-medical | 24 (11.7)                  | 29 (14.1)  | 152 (74.1)            |                |                |
| <b>Prevention</b>                                                                  | Medical     | 37 (4.4)                   | 55 (6.5)   | 749 (89.1)            | 1.88           | 0.391          |
|                                                                                    | Non-medical | 13 (6.3)                   | 16 (7.8)   | 176 (85.9)            |                |                |
| <b>Knowledge score by field of study, gender and contact with COVID-19 patient</b> |             |                            |            |                       |                |                |
| (Maximum possible 0-7)                                                             |             | Median Knowledge Score     |            | Mann-Whitney U test   | <i>P-value</i> |                |
| <b>Field of Study</b>                                                              | Medical     | 6                          |            | 75060.5               | <0.0001        |                |
|                                                                                    | Non-Medical | 5                          |            |                       |                |                |
| <b>Gender</b>                                                                      | Female      | 6                          |            | 127281                | <0.0001        |                |
|                                                                                    | Male        | 5                          |            |                       |                |                |
| <b>Contact with COVID-19</b>                                                       | Yes         | 6                          |            | 68041                 | 0.011          |                |
|                                                                                    | No          | 5                          |            |                       |                |                |

516 \*df (Degrees of freedom) = 2

517  
 518  
 519  
 520  
 521  
 522  
 523  
 524  
 525  
 526  
 527  
 528  
 529

530 **Table 3: Generalized Anxiety Disorder-7 (GAD-7) Scores (0-21) during hospital visits, before and after**  
 531 **online learning by sociodemographic factors**

| <b>GAD-7 score during hospital visits (Medical/dental students) n (%)</b> |              |                      |                   |                                 |                   |           |                 |
|---------------------------------------------------------------------------|--------------|----------------------|-------------------|---------------------------------|-------------------|-----------|-----------------|
|                                                                           |              | <b>Minimal (0-4)</b> | <b>Mild (5-9)</b> | <b>Moderate/ Severe (10-21)</b> | <b>Chi-Square</b> | <b>df</b> | <b>P-value*</b> |
| Gender                                                                    | Female       | 296 (50.2)           | 149 (25.3)        | 145 (24.6)                      | 19.584            | 2         | ≤0.0001         |
|                                                                           | Male         | 135 (67.5)           | 39 (19.5)         | 26 (13)                         |                   |           |                 |
| Specialty                                                                 | Medical      | 243 (58.1)           | 95 (22.7)         | 80 (19.2)                       | 7.535             | 2         | 0.023           |
|                                                                           | Dental       | 116 (47.5)           | 64 (26.2)         | 64 (26.2)                       |                   |           |                 |
| Contact with COVID-19                                                     | No           | 324 (55.9)           | 140 (24.1)        | 116 (20)                        | 18.586            | 2         | ≤0.0001         |
|                                                                           | Yes          | 44 (38.9)            | 26 (23)           | 43 (38.1)                       |                   |           |                 |
| Rotation type                                                             | No Rotation  | 199 (58.4)           | 78 (22.9)         | 64 (18.8)                       | 10.92             | 3         | 0.027           |
|                                                                           | High risk**  | 18 (66.7)            | 2 (7.4)           | 7 (25.9)                        |                   |           |                 |
|                                                                           | Low risk     | 142 (48.3)           | 79 (26.9)         | 73 (24.8)                       |                   |           |                 |
| Clinical Phase of study                                                   | Pre-clinical | 211 (58.4)           | 82 (22.7)         | 68 (18.8)                       | 6.627             | 2         | 0.043           |
|                                                                           | Clinical     | 148 (49.2)           | 77 (25.6)         | 76 (25.2)                       |                   |           |                 |
| <b>GAD-7 score before online learning (all students) n (%)</b>            |              |                      |                   |                                 |                   |           |                 |
| Gender                                                                    | Female       | 376 (47.8)           | 216 (27.5)        | 194 (24.7)                      | 22.435            | 2         | ≤0.0001         |
|                                                                           | Male         | 194 (63.8)           | 58 (19.1)         | 52 (17.1)                       |                   |           |                 |
| Field of Study                                                            | Medical      | 484 (55.7)           | 213 (24.5)        | 172 (19.8)                      | 24.793            | 2         | ≤0.0001         |
|                                                                           | Non-medical  | 86 (38.9)            | 61 (27.6)         | 74 (33.5)                       |                   |           |                 |
| <b>GAD-7 score after online learning (all students) n (%)</b>             |              |                      |                   |                                 |                   |           |                 |
| Gender                                                                    | Female       | 423 (53.8)           | 196 (24.9)        | 167 (21.2)                      | 10.788            | 2         | 0.005           |
|                                                                           | Male         | 197 (64.8)           | 58 (19.1)         | 49 (16.1)                       |                   |           |                 |
| Field of Study                                                            | Medical      | 546 (62.8)           | 194 (22.3)        | 129 (14.8)                      | 81.90             | 2         | ≤0.0001         |
|                                                                           | Non-medical  | 74 (33.5)            | 60 (27.1)         | 87 (39.4)                       |                   |           |                 |
| <b>Change in GAD-7 scores before and after online learning n (%)</b>      |              |                      |                   |                                 |                   |           |                 |
|                                                                           |              | Before>After         | Before=After      | Before <After                   |                   |           |                 |
| Gender                                                                    | Female       | 184 (23.4)           | 479 (60.9)        | 123 (15.6)                      | 12.224            | 2         | 0.0002          |
|                                                                           | Male         | 47 (15.5)            | 219 (72)          | 38 (12.5)                       |                   |           |                 |
| Specialty                                                                 | Medical      | 109 (18.2)           | 405 (67.5)        | 86 (14.3)                       | 36.383            | 4         | ≤0.0001         |
|                                                                           | Dental       | 77 (28.6)            | 171 (63.6)        | 21 (7.8)                        |                   |           |                 |
|                                                                           | Non-medical  | 45 (20.4)            | 122 (55.2)        | 54 (24.4)                       |                   |           |                 |
| Field of Study                                                            | Medical      | 186 (21.4)           | 576 (66.3)        | 107 (12.3)                      | 20.994            | 2         | ≤0.0001         |
|                                                                           | Non-medical  | 45 (20.4)            | 122 (55.2)        | 54 (24.4)                       |                   |           |                 |
| Contact with COVID-19                                                     | No           | 200 (20.9)           | 612 (64)          | 144 (15.1)                      | 0.722             | 2         | 0.697           |
|                                                                           | Yes          | 31 (23.1)            | 86 (64.2)         | 17 (12.7)                       |                   |           |                 |

532 \*Significant at  $p < 0.05$  \*\*High risk rotation includes ICU, ER, OR, Isolation wards

533  
 534  
 535  
 536  
 537  
 538  
 539

540

**Table 4: Ordinal logistic regression model for factors predicting anxiety GAD-7 score**

|                                                                                                 | <b>n (%)</b> | <b>b</b> | <b>SE(b)</b> | <b>P-Value</b> | <b>OR [95% CI]</b> |
|-------------------------------------------------------------------------------------------------|--------------|----------|--------------|----------------|--------------------|
| <i>GAD-7 score during hospital visits</i>                                                       |              |          |              |                |                    |
| Gender Female                                                                                   | 492 (74.3)   | 0.71     | 0.19         | ≤0.001         | 2.02 [1.41-2.91]   |
| Male <sup>a</sup>                                                                               | 170 (25.7)   | -        | -            | -              | 1                  |
| Specialty Medical                                                                               | 418 (63.1)   | -0.49    | 0.16         | 0.002          | 0.61 [0.45-0.84]   |
| Dental <sup>a</sup>                                                                             | 244 (36.9)   | -        | -            | -              | 1                  |
| Contact with COVID-19                                                                           |              |          |              |                |                    |
| No                                                                                              | 552 (83.4)   | -0.77    | 0.21         | ≤0.001         | 0.46 [0.31- 0.69]  |
| Yes <sup>a</sup>                                                                                | 110 (16.6)   | -        | -            | -              | 1                  |
| In Rotation                                                                                     |              |          |              |                |                    |
| No                                                                                              | 341 (51.5)   | -0.09    | 0.22         | 0.672          | 0.91 [0.60-1.40]   |
| Yes <sup>a</sup>                                                                                | 321 (48.5)   | -        | -            | -              | 1                  |
| Clinical phase of study                                                                         |              |          |              |                |                    |
| Pre-clinical                                                                                    | 361 (54.5)   | -0.04    | 0.22         | 0.856          | 0.96 [0.62-1.47]   |
| Clinical <sup>a</sup>                                                                           | 301(45.5)    | -        | -            | -              | 1                  |
| Knowledge score                                                                                 | 662          | 0.18     | 0.08         | 0.024          | 1.19 [1.02-1.40]   |
| <b><i>-2Log-Likelihood 424.53 Likelihood Ratio Chi-Square 48.790 (df=6, p-value≤0.001)</i></b>  |              |          |              |                |                    |
| <i>GAD-7 score before online learning</i>                                                       |              |          |              |                |                    |
| Gender Female                                                                                   | 786 (72.1)   | 0.61     | 0.14         | ≤0.001         | 1.85 [1.41-2.41]   |
| Male <sup>a</sup>                                                                               | 304 (27.9)   | -        | -            | -              | 1                  |
| Field of study                                                                                  |              |          |              |                |                    |
| Medical                                                                                         | 869 (79.7)   | -0.87    | 0.15         | ≤0.001         | 0.42 [0.31-0.56]   |
| Non-medical <sup>a</sup>                                                                        | 221 (20.3)   | -        | -            | -              | 1                  |
| Knowledge score                                                                                 | 1090         | 0.18     | 0.06         | 0.002          | 1.20 [1.07-1.34]   |
| <b><i>-2Log-Likelihood 208.599 Likelihood Ratio Chi-Square 58.130 (df=3, p-value≤0.001)</i></b> |              |          |              |                |                    |
| <i>GAD score after online learning</i>                                                          |              |          |              |                |                    |
| Gender Female                                                                                   | 786 (72.1)   | 0.541    | 0.141        | ≤0.001         | 1.72 [1.30-2.26]   |
| Male <sup>a</sup>                                                                               | 304 (27.9)   | -        | -            | -              | 1                  |
| Field of study                                                                                  |              |          |              |                |                    |
| Medical                                                                                         | 869 (79.7)   | -1.389   | 0.152        | ≤0.001         | 0.25 [0.189-0.34]  |
| Non-medical <sup>a</sup>                                                                        | 221 (20.3)   | -        | -            | -              | 1                  |
| Knowledge score                                                                                 | 1090         | 0.090    | 0.058        | 0.122          | 1.10 [0.98-1.23]   |
| <b><i>-2Log-Likelihood 185.344 Likelihood Ratio Chi-Square 95.435 (df=3, p-value≤0.001)</i></b> |              |          |              |                |                    |

541 <sup>a</sup> reference group, *b* parameter estimate, *SE* Std Error, *OR* Odds Ration, *CI* Confidence Interval

542

543

544

545



Figure 1: Proportion of Medical & Non-Medical Students Reporting "Very much change" in Hygienic Practices related to COVID-19 outbreak

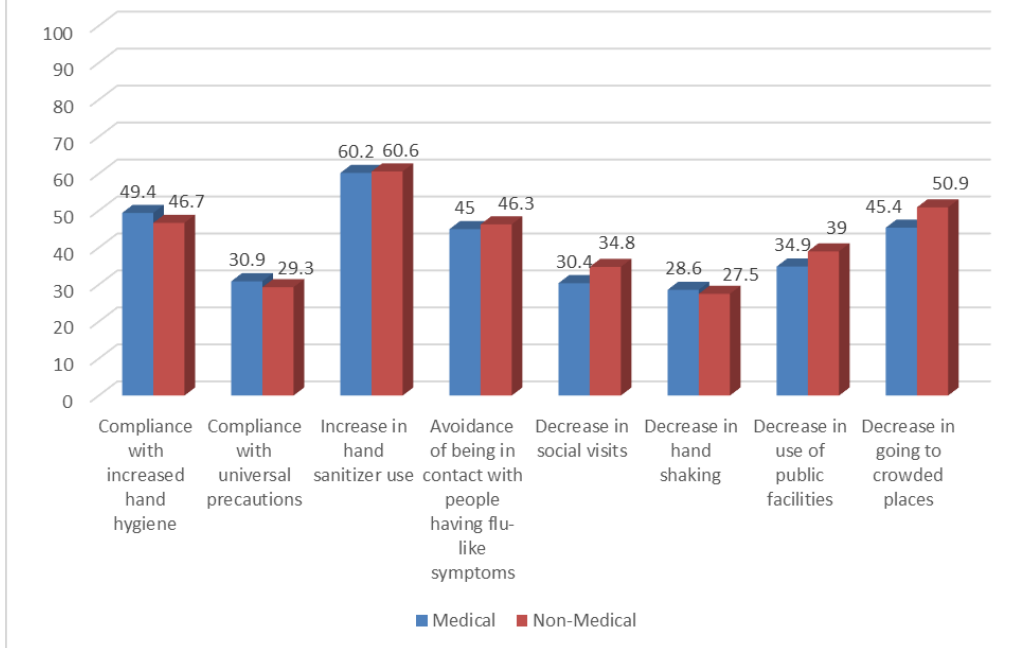

546  
547  
548  
549

Figure 2: Sources of Information for COVID-19 for Medical and Non-medical Students

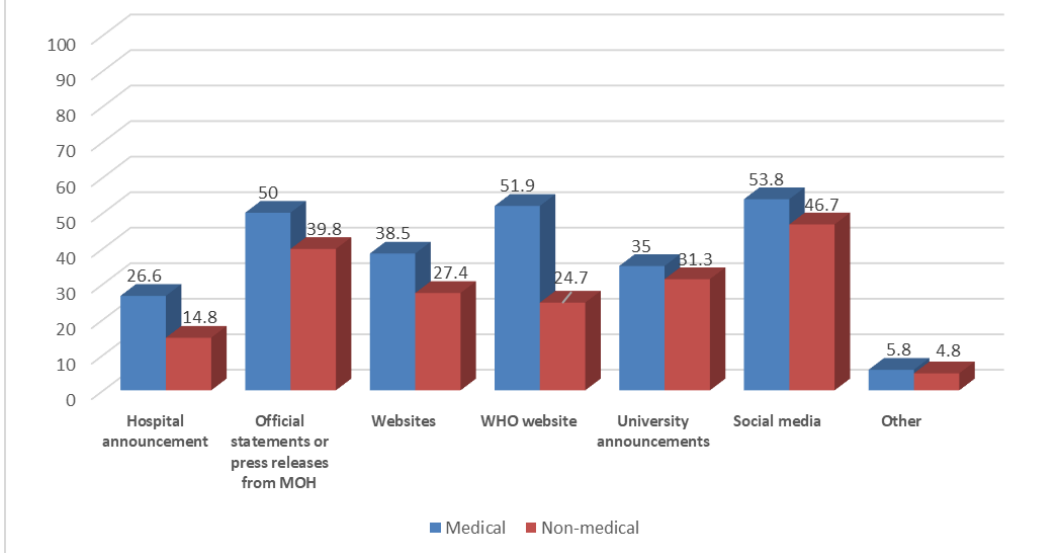

550  
551  
552
